# Supplementary material for: Sensitivity and specificity of an algorithm based on medico-administrative data to identify hospitalized patients with major bleeding presenting to an emergency department
Source: PubMed Central journal article supplement (PMC6798331; doi:10.1186/s12874-019-0841-6), 2019-10-18
Supplement: 12874_2019_841_MOESM1_ESM.pdf [file 12874_2019_841_MOESM1_ESM.pdf]

List of ICD-10 primary hospital diagnostic discharge previously published [5]

| Type                      | ICD-10                                   | Descriptions                                                |
|---------------------------|------------------------------------------|-------------------------------------------------------------|
| Intracranial bleeding     | I60                                      | Nontraumatic subarachnoid hemorrhage                        |
|                           | I61                                      | Nontraumatic intracerebral hemorrhage                       |
|                           | I62                                      | Other and unspecified non-traumatic intracranial hemorrhage |
|                           | S06.3                                    | Focal brain injury                                          |
|                           | S06.4                                    | Epidural hemorrhage                                         |
|                           | S06.5                                    | Traumatic subdural hemorrhage                               |
|                           | S06.6                                    | Traumatic subarachnoid hemorrhage                           |
| Gastrointestinal bleeding | I85.0                                    | Esophageal varices                                          |
|                           | K25.0/2/4/6                              | Gastric ulcer                                               |
|                           | K26.0/2/4/6                              | Duodenal ulcer                                              |
|                           | K27.0/2/4/6                              | Peptic ulcer, site unspecified                              |
|                           | K28.0/2/4/6                              | Gastrojejunal ulcer                                         |
|                           | K29.0                                    | Gastritis and duodenitis                                    |
|                           | K62.5                                    | Hemorrhage of anus and rectum                               |
|                           | K92.0                                    | Hematemesis                                                 |
|                           | K92.1                                    | Melena                                                      |
| K92.2                     | Gastrointestinal hemorrhage, unspecified |                                                             |
| Other bleeding            | D62                                      | Acute posthemorrhagic anemia                                |
|                           | H11.3                                    | Conjunctival hemorrhage                                     |
|                           | H35.6                                    | Retinal hemorrhage                                          |
|                           | H43.1                                    | Vitreous hemorrhage                                         |
|                           | H45.0                                    | Vitreous hemorrhage in disease classified elsewhere         |
|                           | H92.2                                    | Otorrhagia                                                  |
|                           | J94.2                                    | Hemothorax                                                  |
|                           | K66.1                                    | Hemoperitoneum                                              |
|                           | M25.0                                    | Hemarthrosis                                                |
|                           | N02                                      | Recurrent and persistent hematuria                          |
|                           | N92.0/1                                  | Excessive and frequent menstruation                         |
|                           | N92.4                                    | Excessive bleeding in the premenopausal period              |
|                           | N93.8                                    | Other specified abnormal uterine and vaginal bleeding       |
|                           | N93.9                                    | Abnormal uterine and vaginal bleeding, unspecified          |
|                           | N95.0                                    | Postmenopausal bleeding                                     |
|                           | R04.0                                    | Epistaxis                                                   |
|                           | R04.1                                    | Hemorrhage from throat                                      |
|                           | R04.2                                    | Hemoptysis                                                  |
|                           | R04.8                                    | Hemorrhage from other sites in respiratory passages         |
|                           | R04.9                                    | Hemorrhage from respiratory passages, unspecified           |
| R31                       | Hematuria                                |                                                             |
| R58                       | Hemorrhage, not elsewhere classified     |                                                             |

\* 0 = acute with hemorrhage, 2 = acute with hemorrhage and perforation, 4 = chronic or unspecified with hemorrhage, 6 = chronic or unspecified with hemorrhage and perforation
