# Supplementary material for: Sensitivity and specificity of an algorithm based on medico-administrative data to identify hospitalized patients with major bleeding presenting to an emergency department
Source: PubMed Central journal article supplement (PMC6798331; doi:10.1186/s12874-019-0841-6), 2019-10-18
Supplement: 12874_2019_841_MOESM4_ESM.pdf [file 12874_2019_841_MOESM4_ESM.pdf]

Main discharge diagnoses compared to emergency ward (EW) ICD-10 code for 107 stays where emergency ward diagnosis was coded as hemorrhage but not the main discharge diagnosis (false negative)

| Emergency ward diagnoses |                                       | Main discharge diagnoses |                                                                                                                          |
|--------------------------|---------------------------------------|--------------------------|--------------------------------------------------------------------------------------------------------------------------|
| Code                     | Label                                 | Code                     | Label (number)                                                                                                           |
| D62                      | Acute posthemorrhagic anemia          | 2                        | C787 Secondary malignant neoplasm of liver and intrahepatic bile duct                                                    |
| D62                      |                                       |                          | S701 Contusion of thigh                                                                                                  |
| I609                     | Nontraumatic subarachnoid hemorrhage  | 2                        | G459 Transient cerebral ischemic attack, unspecified                                                                     |
| I609                     |                                       |                          | R51 Headache                                                                                                             |
| I619                     | Nontraumatic intracerebral hemorrhage | 12                       | C833 Diffuse large B-cell lymphoma                                                                                       |
| I619                     |                                       |                          | D33 Benign neoplasm of brain (3)                                                                                         |
| I619                     |                                       |                          | G458 Other transient cerebral ischemic attacks                                                                           |
| I619                     |                                       |                          | G911 Obstructive hydrocephalus (2)                                                                                       |
| I619                     |                                       |                          | I63 Cerebral infarction (2)                                                                                              |
| I619                     |                                       |                          | S068 Other specified intracranial injuries (3)                                                                           |
| I850                     | Esophageal varices with bleeding      | 3                        | I983 Esophageal varices with bleeding in disease classified elsewhere (3)                                                |
| K250                     | Acute gastric ulcer with hemorrhage   | 2                        | K221 Ulcer of esophagus                                                                                                  |
| K250                     |                                       |                          | K318 Other specified diseases of stomach and duodenum                                                                    |
| K260                     | Acute duodenal ulcer with hemorrhage  |                          | I728 Aneurysm of other specified arteries                                                                                |
| K625                     | Hemorrhage of anus and rectum         | 26                       | C Malignant neoplasm of rectosigmoid junction (2), cecum (1), rectum (2)                                                 |
| K625                     |                                       |                          | D Carcinoma in situ of colon (1), Neoplasm of uncertain behavior of colon (1), Refractory anemia (1)                     |
| K625                     |                                       |                          | E559 Vitamin D deficiency, unspecified                                                                                   |
| K625                     |                                       |                          | I713 Abdominal aortic aneurysm, ruptured                                                                                 |
| K625                     |                                       |                          | I983 Esophageal varices with bleeding related to disease classified elsewhere                                            |
| K625                     |                                       |                          | K5 Acute vascular disorders of intestine (2), Diverticular disease of large intestine without perforation or abscess (4) |
| K625                     |                                       |                          | K6 Ulcer of anus and rectum (2), Fourth degree hemorrhoids (1)                                                           |
| K625                     |                                       |                          | K7 Alcoholic cirrhosis of liver 1), Acute and subacute hepatic failure (1)                                               |
| K625                     |                                       |                          | R57 Other shock (1), Hypovolemic shock (1)                                                                               |
| K625                     |                                       |                          | S366 Injury of rectum                                                                                                    |
| K625                     |                                       |                          | Z433 Encounter for attention to colostomy                                                                                |
| K661                     | Hemoperitoneum                        | 4                        | R18 Ascites                                                                                                              |
| K661                     |                                       |                          | S366 Injury of rectum (1), other intra-abdominal organs (3), spleen (1)                                                  |

| Emergency ward diagnoses |                               | Main discharge diagnoses |                                                                                             |
|--------------------------|-------------------------------|--------------------------|---------------------------------------------------------------------------------------------|
| Code                     | Label                         | Code                     | Label (number)                                                                              |
| K920                     | Hematemesis                   | 14                       | C Malignant neoplasm of tonsil (1), of fundus of stomach (1), MALT-lymphoma (1)             |
| K920                     |                               |                          | I713 Abdominal aortic aneurysm, ruptured                                                    |
| K920                     |                               |                          | I983 Esophageal varices with bleeding in disease classified elsewhere (7)                   |
| K920                     |                               |                          | K221 Ulcer of esophagus (1), Gastro-esophageal laceration-hemorrhage syndrome (1)           |
| K920                     |                               |                          | N10 Acute pyelonephritis                                                                    |
| K921                     | Melena                        | 6                        | C160 Malignant neoplasm of cardia                                                           |
| K921                     |                               |                          | D508 Other iron deficiency anemias                                                          |
| K921                     |                               |                          | I983 Esophageal varices with bleeding in disease classified elsewhere                       |
| K921                     |                               |                          | K2 Ulcer of esophagus (1), Acute duodenal ulcer without hemorrhage or perforation (1)       |
| K921                     |                               |                          | K573 Diverticular disease of large intestine without perforation or abscess                 |
| R040                     | Epistaxis                     | 4                        | D619 Aplastic anemia, unspecified (1), Drug-induced aplastic anemia (2)                     |
| R040                     |                               |                          | N185 Chronic kidney disease, stage 5                                                        |
| R041                     | Hemorrhage from throat        | 3                        | D695 Secondary thrombocytopenia                                                             |
| R041                     |                               |                          | J358 Other chronic diseases of tonsils and adenoids                                         |
| R041                     |                               |                          | S008 Superficial injury of other parts of head                                              |
| R042                     | Hemoptysis                    | 2                        | J201 Acute bronchitis due to Hemophilus influenzae                                          |
| R042                     |                               |                          | J701 Chronic and other pulmonary manifestations due to radiation                            |
| R31                      | Hematuria                     | 6                        | C679 Malignant neoplasm of bladder, unspecified                                             |
| R31                      |                               |                          | D500 Iron deficiency anemia secondary to blood loss (chronic)                               |
| R31                      |                               |                          | N3 Irradiation cystitis (1), Other specified disorders of urethra (1)                       |
| R31                      |                               |                          | N40 Benign prostatic hyperplasia                                                            |
| R31                      |                               |                          | R33 Retention of urine                                                                      |
| S063                     | Focal traumatic brain injury  | 8                        | D330 Benign neoplasm of brain, supratentorial                                               |
| S063                     |                               |                          | M808 Other osteoporosis with current pathological fracture, vertebra(e)                     |
| S063                     |                               |                          | S06 Diffuse traumatic brain injury (2), Other specified intracranial injuries (2)           |
| S063                     |                               |                          | S720 Fracture of head and neck of femur                                                     |
| S063                     |                               |                          | S836 Sprain of the superior tibiofibular joint and ligament                                 |
| S064                     | Epidural hemorrhage           | 2                        | G951 Vascular myelopathies                                                                  |
| S064                     |                               |                          | S062 Diffuse traumatic brain injury                                                         |
| S065                     | Traumatic subdural hemorrhage | 5                        | S0 Fracture of base of skull (1), Concussion (1), Other specified intracranial injuries (1) |
| S065                     |                               |                          | S270 Traumatic pneumothorax                                                                 |

| Emergency ward diagnoses |                                   | Main discharge diagnoses |                                                          |
|--------------------------|-----------------------------------|--------------------------|----------------------------------------------------------|
| Code                     | Label                             | Code                     | Label (number)                                           |
| S065                     |                                   | S510                     | Open wound of elbow                                      |
| S066                     | Traumatic subarachnoid hemorrhage | 3                        | F103 Alcohol related disorders (with withdrawal seizure) |
| S066                     |                                   | S131                     | Subluxation and dislocation of cervical vertebrae        |
| S066                     |                                   | S021                     | Fracture of base of skull                                |
