# Supplementary material for: Sensitivity and specificity of an algorithm based on medico-administrative data to identify hospitalized patients with major bleeding presenting to an emergency department
Source: Springer Nature journal article supplement (doi:10.1186/s12874-019-0841-6), 2019-10-18
Supplement: MOESM2 [file 17289036]

Codes used by computerized requests made on electronic health records from emergency ward

| ICD-10 | Descriptions                                                                               |
|--------|--------------------------------------------------------------------------------------------|
| D50.9  | Iron deficiency anemia, unspecified                                                        |
| D51.9  | Vitamin B12 deficiency anemia, unspecified                                                 |
| D52.9  | Folate deficiency anemia, unspecified                                                      |
| D62    | Acute post-hemorrhagic anemia                                                              |
| D64.9  | Anemia, unspecified                                                                        |
| I31.2  | Hemopericardium, not elsewhere classified                                                  |
| I60    | Nontraumatic subarachnoid hemorrhage                                                       |
| I61    | Nontraumatic intracerebral hemorrhage                                                      |
| I62    | Other and unspecified non-traumatic intracranial hemorrhage                                |
| I98.3  | Esophageal varices with bleeding in disease classified elsewhere                           |
| J94.2  | Hemothorax                                                                                 |
| K22.6  | gastro-esophageal laceration-hemorrhage syndrome                                           |
| K25.%  | Gastric ulcer                                                                              |
| K26.%  | Duodenal ulcer                                                                             |
| K62.5  | Hemorrhage of anus and rectum                                                              |
| K66.1  | Hemoperitoneum                                                                             |
| K92.0  | Hematemesis                                                                                |
| K92.1  | Melena                                                                                     |
| K92.2  | Gastrointestinal hemorrhage, unspecified                                                   |
| M25.0  | Hemarthrosis                                                                               |
| N93.9  | Abnormal uterine and vaginal bleeding, unspecified                                         |
| R04.0  | Epistaxis                                                                                  |
| R04.1  | Hemorrhage from throat                                                                     |
| R04.2  | Hemoptysis                                                                                 |
| R31    | Hematuria                                                                                  |
| R57. 1 | Hypovolemic shock                                                                          |
| R58    | Hemorrhage, not elsewhere classified                                                       |
| S01.0  | Open wound of scalp                                                                        |
| S06.0  | Concussion                                                                                 |
| S06.2  | Diffuse traumatic brain injury                                                             |
| S06.3  | Focal brain injury                                                                         |
| S06.4  | Epidural hemorrhage                                                                        |
| S06.5  | Traumatic subdural hemorrhage                                                              |
| S06.6  | Traumatic subarachnoid hemorrhage                                                          |
| S27.1  | Traumatic hemothorax                                                                       |
| S27.8  | Injury of other specified intra-thoracic organs                                            |
| S36.0  | Injury of spleen                                                                           |
| S39.0  | Injury of muscle and tendon of abdomen, lower back and pelvis                              |
| T06.5  | Injury of intra-thoracic organs with intra-abdominal and pelvic organs                     |
| T45.5  | Poisoning by, adverse effect of and underdosing of anticoagulants and antithrombotic drugs |
| T79.2  | Traumatic secondary and recurrent hemorrhage                                               |
| T79.6  | Traumatic ischemia of muscle                                                               |
| Y44.2  | Agents primarily affecting blood constituents: anticoagulants                              |
| Y44.4  | Agents primarily affecting blood constituents: antithrombotic drugs                        |
